# Supplementary material for: A hydrophilic interaction liquid chromatography–tandem mass spectrometry method for the identification and determination of cationic starch derivatives in air samples
Source: Royal Society of Chemistry journal article supplement (doi:10.1039/c6ay03409h), 2017-01-01
Supplement: c6ay03409h1.pdf [file c6ay03409h1.pdf]

## **Hydrophilic interaction liquid chromatography tandem mass spectrometry method for the identification and determination of cationic starch derivatives in air samples**

Fabio Gosetti<sup>\*a</sup>, Eleonora Mazzucco<sup>a</sup>, Andrea Secco<sup>b</sup>, Elisa Robotti<sup>a</sup>, Marcello Manfredi<sup>a,c</sup>, Emilio Marengo<sup>a</sup>

<sup>a</sup> *University of Piemonte Orientale, Department of Science and Technological Innovation,  
viale T. Michel 11, 15121 Alessandria, Italy*

<sup>b</sup> *ITECON s.r.l, Via Mario Tacca, 14049 Nizza Monferrato (AT), Italy*

<sup>c</sup> *ISALIT S.r.l., Via G. Bovio, 6, 28100, Novara, Italy*

\*Corresponding author: Dr. Fabio Gosetti, tel. +39 0131 360249, fax: +39 0131 360365;  
e-mail: [fabio.gosetti@uniupo.it](mailto:fabio.gosetti@uniupo.it)

*Keywords:* 2,3-epoxypropyltrimethyl ammonium chloride; 3-chloro-2-  
hydroxypropyltrimethylammonium chloride; air sample; HILIC-MS/MS; QUAB

| $S_{blank}$     | ETA | CTA   |
|-----------------|-----|-------|
| S <sub>1</sub>  | 974 | 22010 |
| S <sub>2</sub>  | 869 | 22080 |
| S <sub>3</sub>  | 941 | 21902 |
| S <sub>4</sub>  | 630 | 22049 |
| S <sub>5</sub>  | 543 | 22091 |
| S <sub>6</sub>  | 876 | 22056 |
| S <sub>7</sub>  | 986 | 21941 |
| S <sub>8</sub>  | 891 | 22065 |
| S <sub>9</sub>  | 964 | 21920 |
| S <sub>10</sub> | 556 | 22070 |

**Table 1S.** Peak areas of  $S_{blank}$  values used for the LOD calculation. For each analyte the quantified transition was used.
